# Supplementary material
Source: MDPI journal article supplement (https://www.mdpi.com/2297-8739/8/10/189)
Supplement: s1 [file s1]

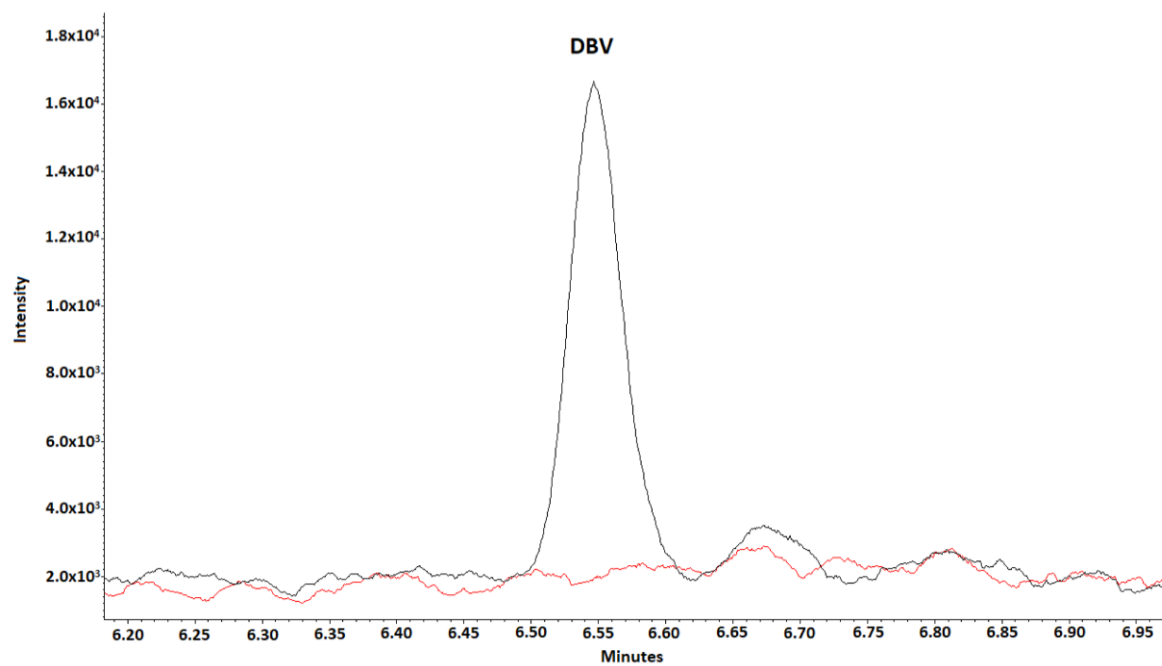

Figure S1, overlaid chromatogram of DBV at the LLOQ and in a blank sample spiked with the drugs tested for interference.
